# Supplementary material for: Phospholipid Phosphatase 4 promotes proliferation and tumorigenesis, and activates Ca2+-permeable Cationic Channel in lung carcinoma cells
Source: PubMed Central journal article supplement (PMC5576330; doi:10.1186/s12943-017-0717-5), 2017-08-29
Supplement: 12943_2017_717_MOESM3_ESM.pdf [file 12943_2017_717_MOESM3_ESM.pdf]

**Table S3. The basic information of 265 patients with non-small cell lung cancer for PLPP4 immunohistochemical staining analysis.**

|                           |        | Cases (n) | Percentage (%) |
|---------------------------|--------|-----------|----------------|
| Histologic                | ADC    | 187       | 70.6           |
|                           | SQC    | 57        | 21.5           |
|                           | Other  | 21        | 7.9            |
| Gender                    | Male   | 175       | 66.0           |
|                           | Female | 90        | 34.0           |
| Age                       | <60    | 100       | 37.7           |
|                           | ≥60    | 164       | 61.9           |
|                           | N/A    | 1         | 0.4            |
| Grade<br>(excluded other) | G1     | 24        | 9.8            |
|                           | G2     | 114       | 46.7           |
|                           | G3     | 93        | 38.1           |
|                           | N/A    | 13        | 5.3            |
| T classification          | T1     | 78        | 29.4           |
|                           | T2     | 123       | 46.4           |
|                           | T3     | 39        | 14.7           |
|                           | T4     | 14        | 5.3            |
|                           | N/A    | 11        | 4.1            |
| N classification          | N0     | 158       | 59.6           |
|                           | N1     | 63        | 23.8           |
|                           | N2     | 28        | 10.6           |
|                           | N3     | 2         | 0.8            |
|                           | N/A    | 14        | 5.3            |
| M classification          | M0     | 232       | 87.5           |
|                           | M1     | 14        | 5.3            |
|                           | N/A    | 19        | 7.2            |

|       |           |    |      |
|-------|-----------|----|------|
| Stage | Stage I   | 93 | 35.1 |
|       | Stage II  | 89 | 33.6 |
|       | Stage III | 48 | 18.1 |
|       | Stage IV  | 14 | 5.3  |
|       | N/A       | 21 | 7.9  |

---

\* ADC: Adenocarcinoma; SQC: Squamous carcinoma; N/A: Not available.

\*\* Other histologic cancers included: Adenosquamous carcinoma (ASC), Large cell neuroendocrine carcinoma (LCNE), Undifferentiated carcinoma (UDC), Epidermoid carcinoma (EPC), Sarcomatoid carcinoma (SARC), and Pleomorphic carcinoma (PMC).
