# Supplementary material for: Phospholipid Phosphatase 4 promotes proliferation and tumorigenesis, and activates Ca2+-permeable Cationic Channel in lung carcinoma cells
Source: PubMed Central journal article supplement (PMC5576330; doi:10.1186/s12943-017-0717-5), 2017-08-29
Supplement: 12943_2017_717_MOESM4_ESM.pdf [file 12943_2017_717_MOESM4_ESM.pdf]

**Table S4. A list of primers used in the reactions for real-time RT-PCR.**

| Gene name |         | Sequence                       |
|-----------|---------|--------------------------------|
| PLPP4     | forward | 5'-TTTGGATCCGTTCCAGAGAG-3'     |
|           | reverse | 5'-CAGGGGTGTGAGGAAAGAAA-3'     |
| CCND1     | forward | 5'-GCCCTCGGTGTCCTACTTC-3'      |
|           | reverse | 5'-CTCCTCCTCGCACTTCTGTT-3'     |
| CCND2     | forward | 5'-GGTCGGGTTTTCAATCACAC-3'     |
|           | reverse | 5'-CCTCTTCACCTCCCTTCAACT-3'    |
| CCND3     | forward | 5'-TCCTCTCCCATTGTCCCTCT-3'     |
|           | reverse | 5'-CCACCAGCCTAACCTTGC-3'       |
| CDK4      | forward | 5'-CAGCTACCAGATGGCACTTACA-3'   |
|           | reverse | 5'-CAAAGATACAGCCAACACTCCA-3'   |
| CDK6      | forward | 5'-GTCAGGTTGTTTGATGTGTGC-3'    |
|           | reverse | 5'-CGGTGTGAATGAAGAAAGTCC-3'    |
| CCNE1     | forward | 5'-CGGTATATGGCGACACAAGA-3'     |
|           | reverse | 5'-ACATACGCAAACCTGGTGCAA-3'    |
| CCNE2     | forward | 5'-AGGAAAACACTACCCAGGATGTCA-3' |
|           | reverse | 5'-ATCAGGCAAAGGTGAAGGATTA-3'   |
| CCNA1     | forward | 5'-GGAAGGCATTTTCTGATCCA-3'     |
|           | reverse | 5'-GCTAGGGCTGCTAACTGCAA-3'     |
| CCNA2     | forward | 5'-ATGTCACCGTTCCTCCTTG-3'      |
|           | reverse | 5'-GGGCATCTTCACGCTCTATT-3'     |
| CDK2      | forward | 5'-TGCCTGATTACAAGCCAAGTT-3'    |
|           | reverse | 5'-GAGTCGAAGATGGGGTACTGG-3'    |
| CCNB1     | forward | 5'-TGAGGAAGAGCAAGCAGTCA-3'     |
|           | reverse | 5'-ATGGTCTCCTGCAACAACCT-3'     |
| CCNB2     | forward | 5'-ACTGCTCTGCTCTTGCTTC-3'      |
|           | reverse | 5'-TTTCTCGGATTTGGGAACTG-3'     |
| CCNB3     | forward | 5'-AGATCCACCAGCTTCACTGC-3'     |
|           | reverse | 5'-GTGACATGAGGGCCATTCTT-3'     |
| CDK1      | forward | 5'-GGTCAAGTGGTAGCCATGAAA-3'    |
|           | reverse | 5'-CCAGGAGGGATAGAATCCAAG-3'    |
| GAPDH     | forward | 5'-GCACCGTCAAGGCTGAGAAC-3'     |
|           | reverse | 5'-TGGTGAAGACGCCAGTGGA-3'      |
