# Supplementary material for: Phospholipid Phosphatase 4 promotes proliferation and tumorigenesis, and activates Ca2+-permeable Cationic Channel in lung carcinoma cells
Source: PubMed Central journal article supplement (PMC5576330; doi:10.1186/s12943-017-0717-5), 2017-08-29
Supplement: 12943_2017_717_MOESM5_ESM.pdf [file 12943_2017_717_MOESM5_ESM.pdf]

**Table S5. A list of primers used in the reactions for clone PCR.**

| Gene name | Sequence                                 |
|-----------|------------------------------------------|
| shPLPP4#1 | 5'-CCGGCCC-GGAGTGATGAACTCGGAAATG         |
|           | forward -TTCAAGAGA-CATTTCCGAGTTCATCACTCC |
|           | -TTTTTG-3'                               |
|           | 5'-AATTCAAAAA-GGAGTGATGAACTCGGAAATG      |
| shPLPP4#2 | reverse -TCTCTTGAA-CATTTCCGAGTTCATCACTCC |
|           | -GGG-3'                                  |
|           | 5'-CCGGCCC-GCTTCACGACGTTCTACTTGG         |
|           | forward -TTCAAGAGA-CCAAGTAGAACGACGTGAAGC |
| shPLPP4#2 | -TTTTTA-3'                               |
|           | 5'-AATTCAAAAA-GCTTCACGACGTTCTACTTGG      |
|           | reverse -TCTCTTGAA-CCAAGTAGAACGACGTGAAGC |
|           | -GGG-3'                                  |
