# Supplementary material for: Phospholipid Phosphatase 4 promotes proliferation and tumorigenesis, and activates Ca2+-permeable Cationic Channel in lung carcinoma cells
Source: PubMed Central journal article supplement (PMC5576330; doi:10.1186/s12943-017-0717-5), 2017-08-29
Supplement: 12943_2017_717_MOESM7_ESM.pdf [file 12943_2017_717_MOESM7_ESM.pdf]

**Table S7. The relationship between PLPP4 IHC expression level and clinical pathological characteristics in 265 patients with non-small cell lung cancer.**

| Parameters       | Number of cases | PLPP4 IHC expression |      | P values |
|------------------|-----------------|----------------------|------|----------|
|                  |                 | Low                  | High |          |
| Histologic       |                 | 137                  | 128  |          |
| ADC              | 187             | 102                  | 85   | 0.061    |
| SQC              | 57              | 23                   | 34   |          |
| Gender           |                 |                      |      |          |
| Male             | 175             | 96                   | 79   | 0.151    |
| Female           | 90              | 41                   | 49   |          |
| Age              |                 |                      |      |          |
| <60              | 100             | 53                   | 47   | 0.779    |
| ≥60              | 164             | 84                   | 80   |          |
| Grade            |                 |                      |      |          |
| G1-G2            | 138             | 91                   | 47   | <0.001*  |
| G3               | 93              | 30                   | 63   |          |
| T classification |                 |                      |      |          |
| T1               | 78              | 50                   | 28   | 0.008*   |
| T2-4             | 176             | 81                   | 95   |          |
| N classification |                 |                      |      |          |
| N0               | 158             | 92                   | 66   | 0.066    |
| N1-3             | 93              | 43                   | 50   |          |
| M classification |                 |                      |      |          |
| M0               | 232             | 129                  | 103  | 0.147    |
| M1               | 14              | 5                    | 9    |          |
| Stage            |                 |                      |      |          |
| I-II             | 182             | 102                  | 80   | 0.010*   |
| III-IV           | 62              | 23                   | 39   |          |

\* IHC: Immunohistochemistry; ADC: Adenocarcinoma; SQC: Squamous carcinoma.
