# Supplementary material for: Phospholipid Phosphatase 4 promotes proliferation and tumorigenesis, and activates Ca2+-permeable Cationic Channel in lung carcinoma cells
Source: Springer Nature journal article supplement (doi:10.1186/s12943-017-0717-5), 2017-08-29
Supplement: MOESM1 [file 14937522]

**Table S1. The basic information of 8 lung cancer patients for PLPP4 mRNA and protein expression analysis.**

|                         |           | Cases (n) | Percentage (%) |
|-------------------------|-----------|-----------|----------------|
| Histologic              | ADC       | 5         | 62.5           |
|                         | SQC       | 2         | 25.0           |
|                         | ASC       | 1         | 12.5           |
| Gender                  | Male      | 5         | 62.5           |
|                         | Female    | 3         | 37.5           |
| Age                     | <60       | 5         | 62.5           |
|                         | ≥60       | 3         | 37.5           |
| Grade<br>(exclude: ASC) | G1        | 2         | 28.6           |
|                         | G2        | 3         | 42.8           |
|                         | G3        | 2         | 28.6           |
| Stage                   | Stage I   | 3         | 37.5           |
|                         | Stage II  | 3         | 37.5           |
|                         | Stage III | 2         | 25.0           |
|                         | Stage IV  | 0         | 0.0            |

\* ADC: Adenocarcinoma; SQC: Squamous carcinoma; ASC: Adenosquamous carcinoma.
