# Supplementary material for: Phospholipid Phosphatase 4 promotes proliferation and tumorigenesis, and activates Ca2+-permeable Cationic Channel in lung carcinoma cells
Source: Springer Nature journal article supplement (doi:10.1186/s12943-017-0717-5), 2017-08-29
Supplement: MOESM2 [file 14937522]

**Table S2. The basic information of 43 patients with benign pulmonary lesions for PLPP4 immunohistochemical staining analysis.**

|                  |                       | Cases (n) | Percentage (%) |
|------------------|-----------------------|-----------|----------------|
| Gender           | Male                  | 33        | 76.7           |
|                  | Female                | 10        | 23.3           |
| Age              | <60                   | 31        | 72.1           |
|                  | ≥60                   | 9         | 20.9           |
|                  | N/A                   | 3         | 7.0            |
| Type of diseases | Amyloidosis           | 1         | 2.3            |
|                  | Fungal infection      | 2         | 4.7            |
|                  | Hamartoma             | 3         | 7.0            |
|                  | Hyperplasia           | 19        | 44.2           |
|                  | Metaplasia            | 1         | 2.3            |
|                  | Pneumonia             | 5         | 11.6           |
|                  | Pulmonary bulla       | 5         | 11.6           |
|                  | Sclerosing hemangioma | 1         | 2.3            |
|                  | Tuberculosis          | 6         | 14.0           |

\* N/A: Not available.
