# Supplementary material for: Phospholipid Phosphatase 4 promotes proliferation and tumorigenesis, and activates Ca2+-permeable Cationic Channel in lung carcinoma cells
Source: Springer Nature journal article supplement (doi:10.1186/s12943-017-0717-5), 2017-08-29
Supplement: MOESM6 [file 14937522]

**Table S6. A list of high throughput datasets used by YuGene meta-analysis for PLPP4 mRNA expression.**

| Series       | Titles (Citation)                                                                                                                                | Samples | Region      |
|--------------|--------------------------------------------------------------------------------------------------------------------------------------------------|---------|-------------|
| E-GEOD-10445 | Transcription profiling of human stage IB lung adenocarcinomas and large cell carcinomas to predict outcomes (Merlion lung cancer study)[1]      | n = 72  | France      |
| E-GEOD-12667 | Transcription profiling by array of human lung adenocarcinoma tissue from smokers, ex-smokers and people who have never smoked[2]                | n = 75  | USA         |
| E-GEOD-18842 | Transcription profiling by array of human non-small cell lung cancer tissue[3]                                                                   | n = 91  | Spain       |
| E-GEOD-19188 | Transcription profiling by array of human lung cancer samples[4]                                                                                 | n =156  | Netherlands |
| E-GEOD-28571 | Expression data of different histological subgroups of non-small cell lung cancer in two patient populations with different survival outcomes[5] | n =100  | Sweden      |
| E-GEOD-30219 | Gene expression in lung cancer identifies a group of metastatic-prone tumors[6]                                                                  | n =307  | France      |
| E-GEOD-31210 | Gene expression data for pathological stage I-II lung adenocarcinomas[7]                                                                         | n =245  | Japan       |
| E-GEOD-31908 | Primary Lung Cancer Specimens                                                                                                                    | n =17   | USA         |
| E-GEOD-33356 | Genome-wide screening of genomic alterations and transcriptional modulation in non-smoking female lung cancer in Taiwan[8]                       | n =120  | Taiwan      |
| E-GEOD-33532 | Intratumor heterogeneity of gene expression profiles in early stage non-small cell lung cancer                                                   | n =100  | Germany     |
| E-GEOD-37745 | Biomarker discovery in non-small cell lung cancer: integrating gene expression profiling, meta-analysis and tissue microarray validation[9]      | n =196  | Sweden      |
| E-GEOD-40791 | Usp44 binds centrin to regulate centrosome positioning and suppress tumorigenesis[10]                                                            | n =194  | USA         |

|              |                                                                                                                                             |        |             |
|--------------|---------------------------------------------------------------------------------------------------------------------------------------------|--------|-------------|
| E-GEOD-43580 | SBV - Gene Expression Profiles of Lung Cancer Tumors - Adenocarcinomas and Squamous Cell Carcinomas[11]                                     | n =150 | Switzerland |
| E-GEOD-50081 | Validation of a histology-independent prognostic gene signature for early stage, non-small cell lung cancer including stage IA patients[12] | n =181 | Canada      |
| E-GEOD-77803 | Retrospective and prospective validation of a 33-gene signature to predict recurrence of lung cancer after surgery                          | n =156 | Denmark     |
| E-MTAB-923   | Transcription profiling by array of human lung samples from patients with adenocarcinoma to identify likely drivers of cell proliferation   | n =103 | France      |
| E-MTAB-1727  | DNA copy number variation profiling and transcription profiling by array of 93 human lung squamous cell carcinoma samples[13]               | n =109 | France      |

---

## References

1. Broet P, Camilleri-Broet S, Zhang S, Alifano M, Bangarusamy D, Battistella M, Wu Y, Tuefferd M, Regnard JF, Lim E *et al*: **Prediction of clinical outcome in multiple lung cancer cohorts by integrative genomics: implications for chemotherapy selection.** *Cancer research* 2009, **69**(3):1055-1062.
2. Ding L, Getz G, Wheeler DA, Mardis ER, McLellan MD, Cibulskis K, Sougnez C, Greulich H, Muzny DM, Morgan MB *et al*: **Somatic mutations affect key pathways in lung adenocarcinoma.** *Nature* 2008, **455**(7216):1069-1075.
3. Sanchez-Palencia A, Gomez-Morales M, Gomez-Capilla JA, Pedraza V, Boyero L, Rosell R, Farez-Vidal ME: **Gene expression profiling reveals novel biomarkers in nonsmall cell lung cancer.** *International journal of cancer* 2011, **129**(2):355-364.
4. Hou J, Aerts J, den Hamer B, van Ijcken W, den Bakker M, Riegman P, van der Leest C, van der Spek P, Foekens JA, Hoogsteden HC *et al*: **Gene expression-based classification of non-small cell lung carcinomas and survival prediction.** *PloS one* 2010, **5**(4):e10312.
5. Micke P, Edlund K, Holmberg L, Kultima HG, Mansouri L, Ekman S, Bergqvist M, Scheibenflug L, Lamberg K, Myrdal G *et al*: **Gene copy number aberrations are associated with survival in histologic subgroups of non-small cell lung cancer.** *J Thorac Oncol* 2011, **6**(11):1833-1840.
6. Rousseaux S, Debernardi A, Jacquiau B, Vitte AL, Vesin A, Nagy-Mignotte H,

- Moro-Sibilot D, Brichon PY, Lantuejoul S, Hainaut P *et al*: **Ectopic activation of germline and placental genes identifies aggressive metastasis-prone lung cancers.** *Sci Transl Med* 2013, **5**(186):186ra166.
7. Okayama H, Kohno T, Ishii Y, Shimada Y, Shiraishi K, Iwakawa R, Furuta K, Tsuta K, Shibata T, Yamamoto S *et al*: **Identification of genes upregulated in ALK-positive and EGFR/KRAS/ALK-negative lung adenocarcinomas.** *Cancer research* 2012, **72**(1):100-111.
  8. Lu TP, Lai LC, Tsai MH, Chen PC, Hsu CP, Lee JM, Hsiao CK, Chuang EY: **Integrated analyses of copy number variations and gene expression in lung adenocarcinoma.** *PloS one* 2011, **6**(9):e24829.
  9. Botling J, Edlund K, Lohr M, Hellwig B, Holmberg L, Lambe M, Berglund A, Ekman S, Bergqvist M, Ponten F *et al*: **Biomarker discovery in non-small cell lung cancer: integrating gene expression profiling, meta-analysis, and tissue microarray validation.** *Clinical cancer research : an official journal of the American Association for Cancer Research* 2013, **19**(1):194-204.
  10. Zhang Y, Foreman O, Wigle DA, Kosari F, Vasmatazis G, Salisbury JL, van Deursen J, Galardy PJ: **USP44 regulates centrosome positioning to prevent aneuploidy and suppress tumorigenesis.** *The Journal of clinical investigation* 2012, **122**(12):4362-4374.
  11. Tarca AL, Lauria M, Unger M, Bilal E, Boue S, Kumar Dey K, Hoeng J, Koepl H, Martin F, Meyer P *et al*: **Strengths and limitations of microarray-based phenotype prediction: lessons learned from the IMPROVER Diagnostic Signature Challenge.** *Bioinformatics* 2013, **29**(22):2892-2899.
  12. Der SD, Sykes J, Pintilie M, Zhu CQ, Strumpf D, Liu N, Jurisica I, Shepherd FA, Tsao MS: **Validation of a histology-independent prognostic gene signature for early-stage, non-small-cell lung cancer including stage IA patients.** *J Thorac Oncol* 2014, **9**(1):59-64.
  13. Brambilla C, Laffaire J, Lantuejoul S, Moro-Sibilot D, Mignotte H, Arbib F, Toffart AC, Petel F, Hainaut P, Rousseaux S *et al*: **Lung squamous cell carcinomas with basaloid histology represent a specific molecular entity.** *Clinical cancer research : an official journal of the American Association for Cancer Research* 2014, **20**(22):5777-5786.
